# Supplementary material
Source: MDPI journal article supplement (https://www.mdpi.com/2227-9717/11/3/874)
Supplement: s1 [file s1]

**Table S1:** Weights for PRs branch with  $\text{TNF}\alpha$  and LTs with  $\text{CCL}_2$ 

| PRs branch ( $w_{PR_i}$ ) | Weight ( $w_{PR_i}$ )<br>$\text{TNF}\alpha$ | LTs branch     | Weight ( $w_{LT_i}$ )<br>$\text{CCL}_2$ |
|---------------------------|---------------------------------------------|----------------|-----------------------------------------|
| $w_{PGE_2}$               | 0.25                                        | $w_{LTB_4}$    | 0.45                                    |
| $w_{PGF_{2\alpha}}$       | 0.27                                        | $w_{epiLTB_4}$ | 0.32                                    |
| $w_{PGD_2}$               | 0.22                                        | $w_{12LTB_4}$  | 0.23                                    |
| $w_{TxB_2}$               | 0.26                                        |                |                                         |

## 1 Materials and Methods

The rate balance equations for all the metabolites of PRs and LTs branches are:

$$\frac{d[5-HETE]}{dt} = k_{5-HETE}[AA]e_{5-HETE}(1 + k_{ATP}[ATP]) - g_{5-HETE}[5-HETE] \quad (1)$$

$$\frac{d[15-HETE]}{dt} = k_{15-HETE}[AA]e_{15-HETE}(1 + k_{ATP}[ATP]) - g_{15-HETE}[15-HETE] \quad (2)$$

### 1.1 PRs branch

$$\begin{aligned} \frac{d[PGH_2]}{dt} = & e_{PGH_2}k_{PGH_2}[AA](1 + k_{ATP}[ATP]) - g_{PGH_2}[PGH_2] - v_{PGD_2}e_{PGD_2}k_{PGD_2}[PGH_2] - \\ & v_{PGE_2}e_{PGE_2}k_{PGE_2}[PGH_2] - v_{PGF_{2\alpha}}e_{PGF_{2\alpha}}k_{PGF_{2\alpha}}[PGH_2] - v_{TXB_2}e_{TXB_2}k_{TXB_2}[PGH_2] \end{aligned} \quad (3)$$

$$\frac{d[PGD_2]}{dt} = v_{PGD_2}e_{PGD_2}k_{PGD_2}[PGH_2] - g_{PGD_2}[PGD_2] - k_{dPGD_2}[PGD_2] - k_{PGJ_2}[PGD_2] \quad (4)$$

$$\frac{d[PGE_2]}{dt} = v_{PGE_2}e_{PGE_2}k_{PGE_2}[PGH_2] - g_{PGE_2}[PGE_2] \quad (5)$$

$$\frac{d[PGF_{2\alpha}]}{dt} = v_{PGF_{2\alpha}}e_{PGF_{2\alpha}}k_{PGF_{2\alpha}}[PGH_2] - g_{PGF_{2\alpha}}[PGF_{2\alpha}] \quad (6)$$

$$\frac{d[TXB_2]}{dt} = v_{TXB_2}e_{TXB_2}k_{TXB_2}[PGH_2] - g_{TXB_2}[TXB_2] \quad (7)$$

$$\frac{d[PGJ_2]}{dt} = k_{PGJ_2}[PGD_2] - g_{PGJ_2}[PGJ_2] - k_{dPGJ_2}[PGJ_2] \quad (8)$$

$$\frac{d[dPGJ_2]}{dt} = k_{dPGJ_2}[PGJ_2] - g_{dPGJ_2}[dPGJ_2] \quad (9)$$

$$\frac{d[dPGD_2]}{dt} = k_{dPGD_2}[PGD_2] - g_{dPGD_2}[dPGD_2] \quad (10)$$

For PRs branch, there are control variables  $u_{PR_i}$  associated with each  $PR_i$ . As an example, enzyme balance for dimensionless  $e_{PGD_2}$ ,  $\varepsilon_{PGD_2}$  is Eq. (11). Similarly, for LTs branch, there are control variables  $u_{LT_i}$  corresponding to each  $LT_i$ .

$$\frac{d\varepsilon_{PGD_2}}{dt} = \beta \left( \alpha' + \frac{k'_{e_{PGD_2}}[PGH_2]u_{PGD_2}}{K_{e_{PGD_2}} + [PGH_2]} \right) - \beta\varepsilon_{PGD_2} \quad (11)$$

The control variables for enzyme synthesis  $u_{PR_i}$  are defined as

$$u_{PR_i} = \frac{\rho_{PR_i}}{\sum_{j=1}^4 \rho_{PR_j}} \text{ for } PR_j = \{PGD_2, PGE_2, PGF_{2\alpha}, TXB_2\} \quad (12)$$

The cybernetic variable for enzyme activity  $v_{PR_i}$  is defined as

$$v_{PR_i} = \frac{\rho_{PR_i}}{\max_{j=1,2,3,4}(\rho_{PR_j})}; \quad PR_j = \{PGD_2, PGE_2, PGF_{2\alpha}, TxB_2\} \quad (13)$$

## 1.2 LTs branch

$$\frac{d[LTA_4]}{dt} = e_{LTA_4} k_{LTA_4} [AA](1 + k_{ATP}[ATP]) - g_{LTA_4} [LTA_4] - \sum_{i=1}^3 v_{LT_i} e_{LT_i} k_{LT_i} [LTA_4], \quad \text{for } LT_i = \{LTB_4, 12LTB_4, 6tLTB_4\} \quad (14)$$

The cybernetic control variable for a LT,  $LT_i$ , is  $v_{LT_i}$ .  $e_{LT_i}$  is the relevant enzyme level and  $g_{LTA_4}$  is the degradation rate of  $LTA_4$ .  $k_{LT_i}$  is the rate constant of the product  $LT_i$ . Eq. (15) is the detailed version of Eq. (14).

$$\frac{d[LTA_4]}{dt} = e_{LTA_4} k_{LTA_4} [AA](1 + k_{ATP}[ATP]) - g_{LTA_4} [LTA_4] - v_{LTB_4} e_{LTB_4} k_{LTB_4} [LTA_4] - v_{12LTB_4} e_{12LTB_4} k_{12LTB_4} [LTA_4] - v_{6tLTB_4} e_{6tLTB_4} k_{6tLTB_4} [LTA_4] \quad (15)$$

The kinetic equation for an LT,  $LT_i$  is Eq. (16). There are no further conversions of LTs, making the downstream fluxes zero (Fig. 1).

$$\frac{d[LT_i]}{dt} = v_{LT_i} e_{LT_i} k_{LT_i} [LTA_4] - g_{LT_i} [LT_i] \quad \text{for } LT_i = \{LTB_4, 6tLTB_4, 12LTB_4\} \quad (16)$$

$$\frac{d[LTB_4]}{dt} = v_{LTB_4} e_{LTB_4} k_{LTB_4} [LTA_4] - g_{LTB_4} [LTB_4] \quad (17)$$

$$\frac{d[6tLTB_4]}{dt} = v_{6tLTB_4} e_{6tLTB_4} k_{6tLTB_4} [LTA_4] - g_{6tLTB_4} [6tLTB_4] \quad (18)$$

$$\frac{d[12LTB_4]}{dt} = v_{12LTB_4} e_{12LTB_4} k_{12LTB_4} [LTA_4] - g_{12LTB_4} [12LTB_4] \quad (19)$$

The control variables for enzyme synthesis  $u_{LT_i}$  are defined as

$$u_{LT_i} = \frac{\rho_{LT_i}}{\sum_{j=1}^3 \rho_{LT_j}} \quad \text{for } LT_j = \{LTB_4, 6tLTB_4, 12LTB_4\} \quad (20)$$

The cybernetic variable for enzyme activity  $v_{PR_i}$  is defined as

$$v_{LT_i} = \frac{\rho_{LT_i}}{\max_{j=1,2,3}(\rho_{LT_j})}; \quad LT_j = \{LTB_4, 6tLTB_4, 12LTB_4\} \quad (21)$$

## 2 RSTE

The AA network is a well-characterized network where the causality between any two metabolites is known. For instance, AA (cause) leads to downstream production of metabolites  $PGD_2$ ,  $PGE_2$ ,  $PGF_{2\alpha}$ ,  $TxB_2$  (effect). To determine the hyperparameters, we run simulations for  $m =$

$\{1, 2, 3, \dots, 10\}$ ,  $q = \{0.1, 0.25, 0.4, \dots, 3\}$ , and  $\tau = \{1, 2, 3, \dots, 50\}$ , and predict the causality for any two metabolites. We choose the  $m, \tau$  and  $q$  combination for which the RSTE model best captures causality for the AA network. The RSTE model developed using the optimized hyperparameters is representative of the AA network causality. We predict causality between AA and the cytokine  $\text{TNF}\alpha$  as well as AA and the chemokine  $\text{CCL}_2$  using the same hyperparameters.

**Table S2:** RSTE values for AA network and AA,  $\text{TNF}\alpha$  (and  $\text{CCL}_2$ ) combination

| Connections ( $m = 3, q = 0.85, \tau = 13$ )                                    | RSTE     |
|---------------------------------------------------------------------------------|----------|
| AA_PGD <sub>2</sub> – PGD <sub>2</sub> _AA                                      | 0.00162  |
| AA_PGF <sub>2a</sub> – PGF <sub>2a</sub> _AA                                    | -0.01007 |
| AA_TxB <sub>2</sub> – TxB <sub>2</sub> _AA                                      | 0.0156   |
| AA_15ddPGD <sub>2</sub> – 15ddPGD <sub>2</sub> _AA                              | 0.0301   |
| AA_PGJ <sub>2</sub> – PGJ <sub>2</sub> _AA                                      | 0.0224   |
| AA_15ddPGJ <sub>2</sub> – 15ddPGJ <sub>2</sub> _AA                              | 0.028    |
| AA_ketPGD <sub>2</sub> – ketPGD <sub>2</sub> _AA                                | 0.037    |
| AA_LTB <sub>4</sub> – LTB <sub>4</sub> _AA                                      | 0.031    |
| AA_epiL – epiL_AA                                                               | 0.09     |
| AA_transL – transL_AA                                                           | 0.014    |
| AA_HETE5 – HETE5_AA                                                             | -0.025   |
| AA_HETE15 – HETE15_AA                                                           | -0.005   |
| PGD <sub>2</sub> _15ddPGD <sub>2</sub> – 15ddPGD <sub>2</sub> _PGD <sub>2</sub> | 0.0014   |
| PGD <sub>2</sub> _PGJ <sub>2</sub> – PGJ <sub>2</sub> _PGD <sub>2</sub>         | 0.025    |
| PGD <sub>2</sub> _15ddPGJ <sub>2</sub> – 15ddPGJ <sub>2</sub> _PGD <sub>2</sub> | 0.033    |
| PGD <sub>2</sub> _ketPGD <sub>2</sub> – ketPGD <sub>2</sub> _PGD <sub>2</sub>   | 0.008    |
| PGJ <sub>2</sub> _15ddPGJ <sub>2</sub> – 15ddPGJ <sub>2</sub> _PGJ <sub>2</sub> | -0.015   |
| AA_TNF $\alpha$ – TNF $\alpha$ _AA                                              | 0.0002   |
| AA_CCL <sub>2</sub> – CCL <sub>2</sub> _AA                                      | 0.0004   |

**Table S3** Calculated kinetic parameters for the COX pathway. The columns represent parameters calculated for the cybernetic model. The parameters are estimated using the simulation strategy discussed in the paper.

| Parameter           | Values   | Parameter                | Values | Parameter         | Values | Parameter        | Values |
|---------------------|----------|--------------------------|--------|-------------------|--------|------------------|--------|
| $k_{PGE_2}$         | 0.0062   | $k'_{e_{PGE_2}}$         | 0.8778 | $LTA4_{K0}$       | 0.0005 | $k_{e_{HETE15}}$ | 0.6863 |
| $k_{PGF_{2\alpha}}$ | 0.0018   | $k'_{e_{PGF_{2\alpha}}}$ | 0.3786 | $e_{LTB4_{K0}}$   | 0.5566 | $K_{mLK}$        | 0.0135 |
| $k_{TxB_2}$         | 0.0103   | $k'_{e_{TxB_2}}$         | 0.4835 | $e_{epiL_{K0}}$   | 0.7405 | $\beta$          | 0.8909 |
| $k_{dPGD_2}$        | 0.0520   | $e_{PGH2_{K0}}$          | 0.8286 | $e_{transL_{K0}}$ | 0.7306 |                  |        |
| $k_{PGJ_2}$         | 0.0207   | $e_{PGD2_{K0}}$          | 0.1651 | $e_{LTA4_{K0}}$   | 0.7975 |                  |        |
| $k_{dPGJ_2}$        | 0.0388   | $e_{PGE2_{K0}}$          | 0.1622 | $e_{HETE15_{K0}}$ | 0.6656 |                  |        |
| $g_{PGH_2}$         | 0.4186   | $e_{PGF2\alpha_{K0}}$    | 0.7993 | $k'_{e_{LTB4}}$   | 0.4317 |                  |        |
| $g_{PGD_2}$         | 0.0045   | $e_{TxB2_{K0}}$          | 0.5614 | $k'_{ee_{piL}}$   | 0.2715 |                  |        |
| $g_{PGE_2}$         | 1.32E-06 | $k_{LTB4}$               | 4.9256 | $k'_{e_{transL}}$ | 0.3207 |                  |        |
| $g_{PGF_{2\alpha}}$ | 7.11E-07 | $k_{epiL}$               | 4.4478 | $k'_{e_{LTA4}}$   | 0.5733 |                  |        |
| $g_{TxB_2}$         | 7.12E-07 | $k_{transL}$             | 4.4778 | $LTA4_0$          | 0.0010 |                  |        |
| $g_{dPGD_2}$        | 7.07E-07 | $k_{LTA4}$               | 0.0002 | $LTA4_{K0}$       | 0.0005 |                  |        |
| $g_{PGJ_2}$         | 7.10E-07 | $k_{HETE5}$              | 0.0005 | $e_{LTB4_{K0}}$   | 0.5566 |                  |        |
| $g_{dPGJ_2}$        | 0.1032   | $k_{HETE15}$             | 0.0001 | $e_{epiL_{K0}}$   | 0.7405 |                  |        |
| $PGH2_0$            | 0.0074   | $g_{LTB4}$               | 0.8706 | $e_{transL_{K0}}$ | 0.7306 |                  |        |
| $PGH2_{K0}$         | 0.9999   | $g_{epiL}$               | 0.4394 | $e_{LTA4_{K0}}$   | 0.7975 |                  |        |
| $k_{ATP}$           | 4.9991   | $g_{transL}$             | 0.7316 | $e_{HETE15_{K0}}$ | 0.6656 |                  |        |
| $K_{mAA}$           | 48.0240  | $g_{LTA4}$               | 0.3299 |                   |        |                  |        |

### 3 Development of Mutual information formulation for time series

In what follows, we briefly describe our approach for formulating mutual information for bivariate time series.

Note that Shannon's mutual information  $I(X; Y)$ , Eq. (10) can be written in terms of expectation as follows

$$I(X; Y) = \mathbb{E}_p[\lambda(x_i, y_j)] \quad ; \quad \lambda(x_i, y_j) = \log p(x_i, y_j) - \log p(x_i) - \log p(y_j) \quad (22)$$

where  $\mathbb{E}_p[.]$  denotes the expectation operator.  $I(X; Y)$  is the expectation of the difference between the log likelihood of two variables  $\log p(x_i, y_j)$  and single variable  $\log p(x_i)$ ,  $\log p(y_j)$  with respect to the joint probability distribution  $p(x_i, y_j)$ . Galka et al. [1] redefined  $\lambda(x_i, y_j)$  in Eq. (22) by pairing the time points as

$$\lambda(\vec{X}_t, \vec{Y}_t) = \log \left( p_{xy} \left( (x_1, y_1), (x_2, y_2), \dots, (x_N, y_{N_t}) \right) \right) - \log p_x(x_1, x_2, \dots, x_{N_t}) - \log p_y(y_1, \dots, y_{N_t})$$

( 23 )

The short-hand notation for Eq. 23 is  $\lambda(\vec{X}_t, \vec{Y}_t) = L(\vec{X}_t, \vec{Y}_t) - L(\vec{X}_t) - L(\vec{Y}_t)$  where  $L(\cdot)$  denotes the log-likelihood operation. Eq. 23 involves estimating high-dimensional joint probability densities; evaluating them is computationally expensive due to the intra and inter-temporal correlations. To overcome this obstacle, Galka et al. [1] suggest formulating them in terms of probability densities of the corresponding innovation series [1]. The authors recommend describing the temporal correlations by a time series prediction model. This model makes future time predictions using past time points, ensuring that the system follows causality. Conventionally, the vector autoregressive (VAR) model for a two-dimension time series  $(z_t^{(1)})$  and  $(z_t^{(2)})$  is used to capture the data's inter and intra-temporal correlations based on causality [2]. The VAR model has a hyperparameter  $p$  that denotes the temporal dependency to the past time points. More precisely, this model entails the target variable  $(z_t^{(1)})$  which equals to a weighted linear combination of its  $p$  past values and  $p$  past values of the other time series, an error term series  $(e_t)$  and a constant  $\mu$ , as shown in Eq. 24 and Eq. 25.

$$z_t^{(1)} = \sum_{k=1}^p \alpha_k^{(1)} z_{t-k}^{(1)} + \sum_{i=1}^p \beta_i^{(1)} z_{t-k}^{(2)} + e_t + \mu^{(1)} ; \quad z_t^{(1)} - \hat{z}_t^{(1)} = e_t \quad (24)$$

$$z_t^{(2)} = \sum_{k=1}^p \alpha_k^{(2)} z_{t-k}^{(1)} + \sum_{i=1}^p \beta_i^{(2)} z_{t-k}^{(2)} + f_t + \mu^{(2)} ; \quad z_t^{(2)} - \hat{z}_t^{(2)} = f_t \quad (25)$$

VAR makes one-step ahead prediction,  $\hat{z}_t^{(1)}$  of the target variable  $(z_t^{(1)})$ . The innovation of the prediction  $(\hat{z}_t^{(1)})$  at an instant,  $e_t$  is the difference between the observed  $z_t^{(1)}$  and predicted value  $\hat{z}_t^{(1)}$ . The innovations conceptually represent the error between the model predictions and the observed values. We use the VAR model to determine the innovation series for  $\vec{X}_t$  and  $\vec{Y}_t$  using Eq. 24 and 25, respectively. Our method uses VAR only unlike Galka's technique which employs both AR and VAR [1]. We use VAR only because (1) mutual dependence estimations tend to improve by applying VAR filters and (2) the two series are generated according to a joint probability distribution, indicating that  $\vec{X}_t$  and  $\vec{Y}_t$  are correlated. Moreover, this approach is better consistent with the standard definition of MI. We mathematically derived that the joint probability density of  $\vec{X}_t$  is the same as the joint probability density of the corresponding innovation series  $e_t$ . This is true for the  $\vec{Y}_t$  series and the paired  $(\vec{X}_t, \vec{Y}_t)$  series.

$$p_X(x_1, x_2, x_3, \dots, x_{N_t}) = p_e(e_1, e_2, \dots, e_{N_t}) ; p_Y(y_1, y_2, y_3, \dots, y_{N_t}) = p_f(f_1, f_2, \dots, f_{N_t}) \quad (26)$$

$$p_{XY}((x_1, y_1), (x_2, y_2), (x_3, y_3), \dots, (x_{N_t}, y_{N_t})) = p_{ef}((e_1, f_1), (e_2, f_2), \dots, (e_{N_t}, f_{N_t})) \quad (27)$$

A befitting time series forecasting method yields a white noise innovation data set. If the time points are from an independent and identically distributed (i.i.d) sequence, the joint probability of the innovation time series deciphers as the product of marginal probability densities per Eq. (28). This is true for joint probability distribution of time series  $Y_t$  per Eq. (28).

$$p_e(e_1, e_2, \dots, e_t) = p_e(e_1)p_e(e_2)\dots p_e(e_t); \quad p_f(f_1, f_2, \dots, f_t) = p_f(f_1)p_f(f_2)\dots p_f(f_t) \quad (28)$$

$$p_{ef}((e_1, f_1), \dots, (e_t, f_t)) = p_{ef}(e_1, f_1) p_{ef}(e_2, f_2) \dots p_{ef}(e_t, f_t) \quad (29)$$

We write Eq. 29 as mentioned because  $\{(e_1, f_1), \dots, (e_t, f_t)\}$  are independent of each other. Thus, Eq. 23 takes the form

$$\lambda(\vec{X}_t, \vec{Y}_t) = \sum_{i=1}^{N_t} \log \left( \frac{p_{ef}(e_i, f_i)}{p_e(e_i)p_f(f_i)} \right) \quad (30)$$

$$IT(\vec{X}_t; \vec{Y}_t) = \int_{-\infty}^{\infty} \sum_{i=1}^{N_t} \log \left( \frac{p_{ef}(e_i, f_i)}{p_e(e_i)p_f(f_i)} \right) p(e_1, f_1) p(e_2, f_2) \dots p(e_{N_t}, f_{N_t}) de_1 \dots de_{N_t} df_1 \dots df_{N_t} \quad (31)$$

To derive MI formulation for continuous variables, we take the average of Eq. 30 with respect to the joint probability distribution and integrate as per Eq. 31. We know that  $\int_{-\infty}^{\infty} p(e_i, f_i) de_i df_i = 1$ , hence MI formulation for bivariate temporally correlated time series,  $IT(\vec{X}_t; \vec{Y}_t)$ , is

$$IT(\vec{X}_t; \vec{Y}_t) = N_t \iint_{-\infty}^{\infty} p_{ef}(e_i, f_i) \log \left( \frac{p_{ef}(e_i, f_i)}{p_e(e_i)p_f(f_i)} \right) de_i df_i \quad (32)$$

For Eq. 32 derivation, we employ the fact that the integral for all time points will be the same as they all belong to identical probability distributions.

Galka et al. developed the “innovation approach to compute mutual information” for temporally correlated time series [1]. The authors originally considered time series with Gaussian distribution as the innovation series. However, the innovation series can also follow nonparametric distributions. We build upon Galka et al.’s innovation approach and propose an estimation method for  $IT(\vec{X}_t; \vec{Y}_t)$ , valid for parametric and nonparametric distributions of the innovation series. Our method uses VAR only for innovation series determination unlike Galka’s technique which employs both AR and VAR [1]. We use VAR only because (1) mutual dependence estimations tend to improve by applying VAR filters and (2) the two series are generated according to a joint probability distribution, indicating that  $\vec{X}_t$  and  $\vec{Y}_t$  are correlated. Moreover, this approach is consistent with the standard definition of MI.

Eq. 33 denotes the  $IT(\vec{X}_t; \vec{Y}_t)$  formulation in terms of joint entropy,  $HT(\vec{X}_t, \vec{Y}_t)$ , defined in Eq. 34, and entropies for  $X_t$ ,  $HT(\vec{X}_t)$  and  $\vec{Y}_t$ ,  $HT(\vec{Y}_t)$ , detailed in Eq. 35. Eq. 32 indicates that  $IT(\vec{X}_t; \vec{Y}_t)$  quantifies the shared interaction between the bivariate time series similar to Shannon’s MI representation.

$$IT(\vec{X}_t; \vec{Y}_t) = HT(\vec{X}_t) + HT(\vec{Y}_t) - HT(\vec{X}_t, \vec{Y}_t) \quad (33)$$

$$HT(\vec{X}_t, \vec{Y}_t) = -N_t \iint_{-\infty}^{\infty} p_{ef}(e_i, f_i) \log p_{ef}(e_i, f_i) de_i df_i \quad (34)$$

$$HT(\vec{X}_t) = -N_t \int_{-\infty}^{\infty} p_e(e_i) \log p_e(e_i) de_i; \quad HT(\vec{Y}_t) = -N_t \int_{-\infty}^{\infty} p_f(f_i) \log p_f(f_i) df_i \quad (35)$$

**Remark:** Note that  $IT(\vec{X}_t; \vec{Y}_t)$ , Eq. 32 observes the following properties:

- (a)  $IT(\vec{X}_t; \vec{Y}_t) \geq 0$ . It is always non-negative.
- (b)  $IT(\vec{X}_t; \vec{Y}_t) = 0$  if and only if the time series are independent of each other.
- (c)  $IT(\vec{X}_t; \vec{Y}_t) = IT(\vec{Y}_t; \vec{X}_t)$  implies that  $IT(\vec{X}_t; \vec{Y}_t)$  is symmetric.

$IT(\vec{X}_t; \vec{Y}_t) \leq \min(HT(\vec{X}_t), HT(\vec{Y}_t))$ , following the similar arguments based on Jensen’s inequality application to Shannon’s MI formulation  $I(X; Y)$ . It is important to note that the properties (a)-(d) of  $IT(\vec{X}_t; \vec{Y}_t)$  retains the standard characteristics of Shannon’s MI formulation  $I(X; Y)$ .

#### 4 F-test calculation

$$F = \frac{\left( \sum_{j=1}^{nt} (Y_j^{trt} - \bar{X}_j^{trt})^2 + \sum_{j=1}^{nt} (Y_j^{ctrl} - \bar{X}_j^{ctrl})^2 \right) / (ne \times nt)}{\left( \sum_{j=1}^{nt} \sum_{i=1}^{nr} (X_{ij}^{trt} - \bar{X}_j^{trt})^2 + \sum_{j=1}^{nt} \sum_{i=1}^{nr} (X_{ij}^{ctrl} - \bar{X}_j^{ctrl})^2 \right) / (ne \times nt \times (nr - 1))} \quad (36)$$

where  $X_j$ ,  $\bar{X}_j$ , and  $Y_j$  denote the experimental data, mean experimental data, and simulated (fitted) data at time point  $j$ , respectively.  $nr$  is the number of replicates ( $nr = 3$ , indexed as  $i$ ),  $nt$  is the number of time points ( $nt = 7$ , indexed as  $j$ ).  $ne$  is the number of experimental conditions used, and  $trt$  and  $ctrl$  are treatment and control groups, respectively. The degrees of freedom for determining the  $F$  distribution are  $df_1 = (ne \times nt)$  and  $df_2 = (ne \times nt \times (nr - 1))$ .

**Table S4.** Model Accuracy for the formulated cybernetic goal. Goodness of fit,  $F$ -test, for simulated/optimized (control, adenosine triphosphate (ATP) stimulated, and Kdo2-Lipid A (KLA) primed data) and predicted (Kdo2-Lipid A (KLA) primed and ATP stimulated) cases.  $F$  values smaller than  $F_{0.05}(21, 42) = 0.51$  indicate that the fit-error is statistically smaller than the experimental error; whereas, the  $F$  values smaller than  $F_{0.95}(21, 42) = 1.81$  indicate statistically equal variance in simulated (fitted) and experimental data.

| Metabolite                   | Model Fit<br>to Data | Model Prediction<br>to KLA+ATP Data |
|------------------------------|----------------------|-------------------------------------|
| PGD <sub>2</sub>             | 0.4462               | 0.6549                              |
| PGE <sub>2</sub>             | 0.6382               | 0.827                               |
| PGF <sub>2α</sub>            | 0.2873               | 0.4174                              |
| TXB <sub>2</sub>             | 0.4209               | 0.3783                              |
| dPGD <sub>2</sub>            | 0.4869               | 1.8715                              |
| PGJ <sub>2</sub>             | 0.4453               | 0.6674                              |
| dPGJ <sub>2</sub>            | 0.4534               | 1.0044                              |
| LTB <sub>4</sub>             | 0.233                | 0.2499                              |
| 12-epi-LTB <sub>4</sub>      | 0.2473               | 0.291                               |
| 6-trans-epi-LTB <sub>4</sub> | 0.2321               | 0.2508                              |
| 5-HETE                       | 0.289                | 0.5084                              |
| 15-HETE                      | 0.2833               | 0.3755                              |

#### Bibliography

- [1] A. Galka, T. Ozaki, J.B. Bayard, O. Yamashita, Whitening as a tool for estimating mutual information in spatiotemporal data sets, *J. Stat. Phys.* 124 (2006) 1275–1315. <https://doi.org/10.1007/s10955-006-9131-x>.
- [2] R. Kigozi, K. Zinszer, A. Mpimbaza, A. Sserwanga, S.P. Kigozi, M. Kamya, Assessing temporal associations between environmental factors and malaria morbidity at varying transmission settings in Uganda, *Malar. J.* 15 (2016) 4–9. <https://doi.org/10.1186/s12936-016-1549-2>.
